# Supplementary material for: Novel glycopolymer sensitizes Burkholderia cepacia complex isolates from cystic fibrosis patients to tobramycin and meropenem
Source: PubMed Central journal article supplement (PMC5491046; doi:10.1371/journal.pone.0179776), 2017-06-29

**Combination Treatment (with Ceftazidime)**

**Combination Treatment (with PAAG)**

**A**

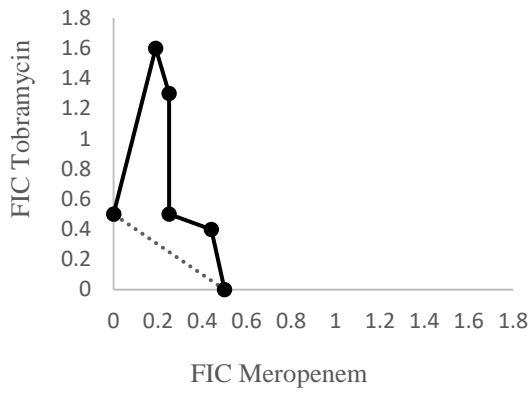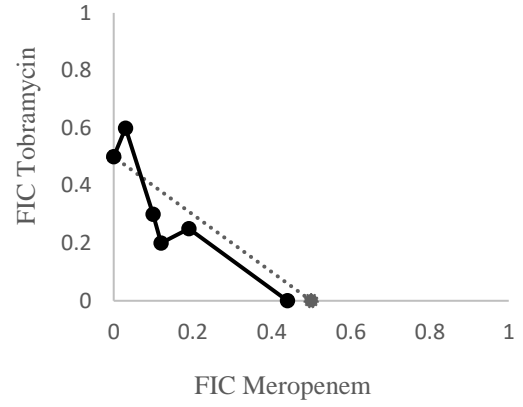

**B**

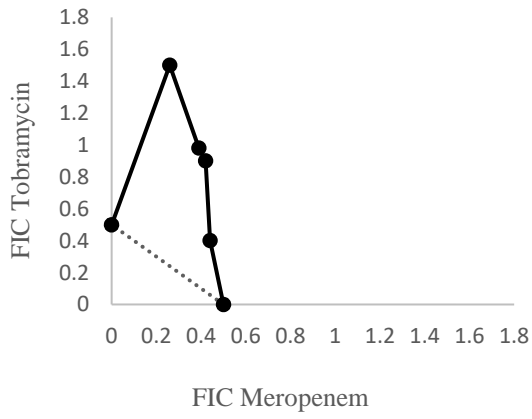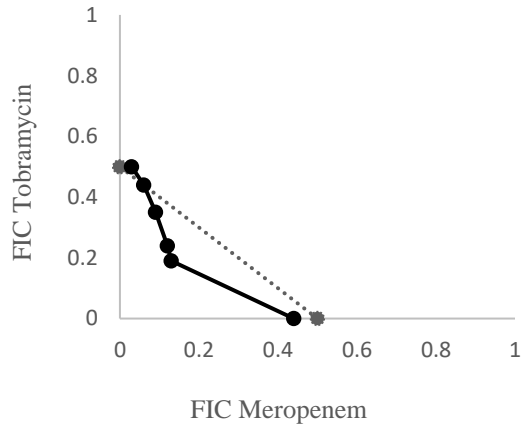

**C**

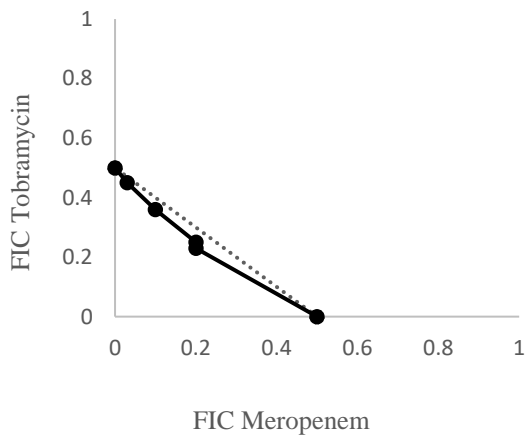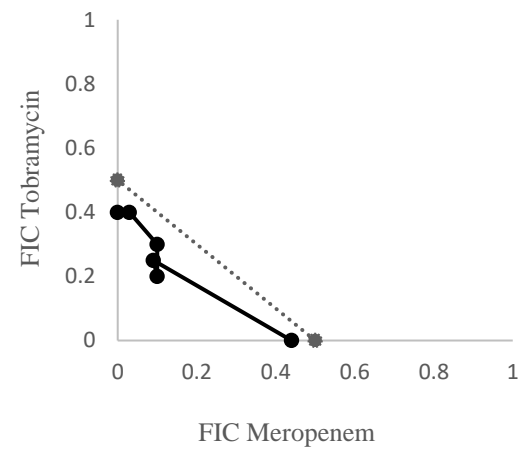

**Combination Treatment (with Ceftazidime)**

D

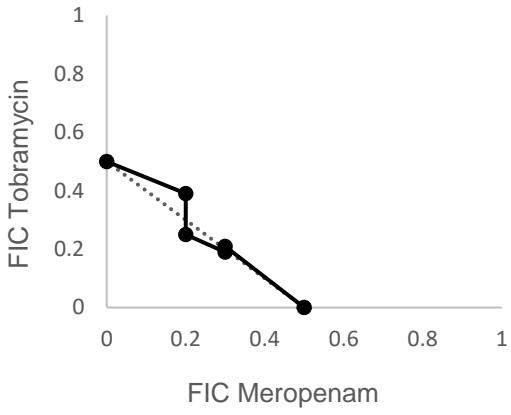

**Combination Treatment (with PAAG)**

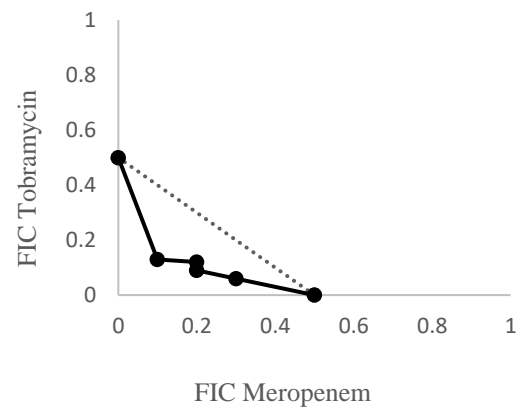

E

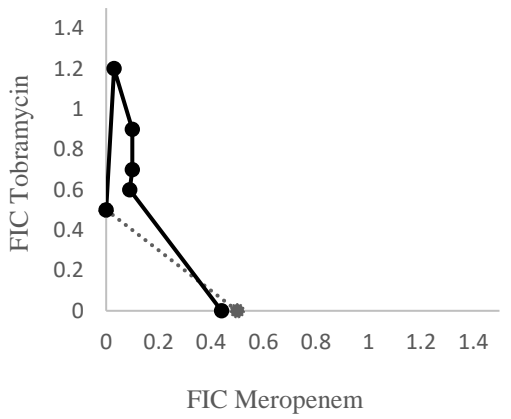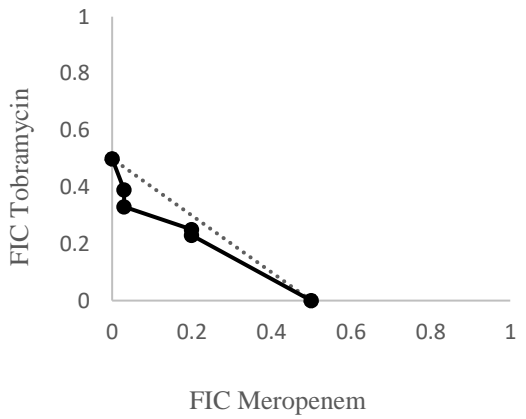

Supplement: pone.0179776.s001.pdf [file pone.0179776.s001.pdf]
